# 1 Low-cost, sub-micron resolution, wide-field 2 computational microscopy using opensource 3 hardware

4  
5 **TOMAS AIDUKAS<sup>1</sup>, REGINA ECKERT<sup>2</sup>, ANDREW R. HARVEY<sup>1\*</sup>, LAURA WALLER<sup>2</sup>,**  
6 **PAVAN C. KONDA<sup>1</sup>**

7 <sup>1</sup> *Imaging Concepts Group, School of Physics and Astronomy, University of Glasgow, Scotland, G12 8QQ, UK*

8 <sup>2</sup> *Department of Electrical Engineering and Computer Sciences, University of California, Berkeley, California 94720, USA*

9 *\*[Andy.Harvey@glasgow.ac.uk](mailto:Andy.Harvey@glasgow.ac.uk)*

10

## 11 **ABSTRACT**

12 The revolution in low-cost consumer photography and computation provides fertile  
13 opportunity for a disruptive reduction in the cost of biomedical imaging. Conventional  
14 approaches to low-cost microscopy are fundamentally restricted, however, to modest field of  
15 view (FOV) and/or resolution. We report a low-cost microscopy technique, implemented with  
16 a *Raspberry Pi* single-board computer and color camera combined with Fourier ptychography  
17 (FP), to computationally construct 25-megapixel images with sub-micron resolution. New  
18 image-construction techniques were developed to enable the use of the low-cost Bayer color  
19 sensor, to compensate for the highly aberrated re-used camera lens and to compensate for  
20 misalignments associated with the 3D-printed microscope structure. This high ratio of  
21 performance to cost is of particular interest to high-throughput microscopy applications,  
22 ranging from drug discovery and digital pathology to health screening in low-income countries.  
23 3D models and assembly instructions of our microscope are made available for open source  
24 use.

## 25 **Introduction**

26 Low-cost, high-performance portable microscopes are essential tools for disease diagnosis in  
27 remote and resource-limited communities [1]. A fundamental requirement is to combine wide  
28 field of view (FOV) with the high resolution necessary for imaging of sub-cellular features of  
29 biological samples. This underpins efficient inspection of extended, statistically-significant  
30 areas for screening of, for example, cancer, malaria, or sickle cell anemia [2]. In conventional  
31 imaging, the number of pixels in the detector array constitutes a hard limit on the space-  
32 bandwidth product (SBP – the number of pixels in a Nyquist-sampled image) [3,4] so that  
33 increased FOV can be achieved only at the expense of reduced spatial resolution. SBP can be  
34 increased using larger detector arrays coupled with higher-performance, wide-field aberration-  
35 corrected optics, or by mechanical scanning, but these approaches add complexity, cost and  
36 bulk [5,6].

37 Several low-cost portable microscopes have been proposed [7–12], but they all suffer  
38 from the problem of small SBP. Early progress towards low-cost microscopy has involved the  
39 use of a high-cost microscope objective lens coupled to a mobile-phone camera [7] and such  
40 instruments tend to suffer from a higher system cost, vignetting, short working distance, small  
41 depth of field (DOF) and narrow FOV. Lower-cost implementations have been reported in  
42 which the microscope objective is replaced by a camera lens from a mobile phone [8], or a ball  
43 lens [9], but their resolving power is limited by the small numerical aperture (NA) and high

44 aberrations. Of these implementations, the use of mobile-phone camera lenses as objectives  
45 places an upper limit on the SBP: for example a 4- $\mu\text{m}$  spatial resolution across 9mm<sup>2</sup> FOV  
46 corresponding a SBP of 2.25Mpixel [8]. The 4- $\mu\text{m}$  resolution is insufficient for observing sub-  
47 cellular features and while a higher NA can be obtained using ball lenses, providing a resolution  
48 around 1.5  $\mu\text{m}$ , they suffer from small SBP [8,13].

49 We report a low-cost, wide-field, high-resolution Fourier-ptychographic microscope  
50 (FPM) [14], implemented with 3D-printed opto-mechanics and a *Raspberry Pi* single-board  
51 computer for data acquisition as shown in Fig. 1(a). High-SBP images are constructed from  
52 multiple low-resolution, detector-SBP limited images, captured in time-sequence using oblique  
53 illumination angles yielding a SBP that is much greater than that of the detector. We  
54 demonstrate 25-Megapixel microscopy using a 4-Megapixel detector array. The tilted  
55 illuminations provide translations of higher spatial-frequency bands into the passband of the  
56 objective lens [15]. Stitching of images in the frequency domain is implemented using an  
57 iterative phase-retrieval algorithm to recover high-resolution amplitude and phase of the  
58 sample image [16,17], as well as aberrations due to the objective [14]. Recovery of phase  
59 information enables imaging of unstained transparent samples [18] and computational  
60 calibration of illumination angles during image reconstruction is able to correct errors arising  
61 from misalignment of various components [19,20], which is of particular importance for  
62 microscopy using low-cost 3D-printed devices.

63 In previous demonstrations of a low-cost 3D-printed FPM, the SBP was limited by the  
64 severe off-axis aberrations of the mobile-phone camera lens (1.5  $\mu\text{m}$  resolution across 0.88mm<sup>2</sup>  
65 FOV giving a SBP of 1.56Mpixels), and employed a science-grade, high-cost monochrome  
66 sensor [21]. Exploiting the mass market for consumer color sensors in mobile phone cameras,  
67 we demonstrate the first use of a low-cost consumer color camera in FPM, to gain more than  
68 an order-of-magnitude cost reduction for an equivalent SBP. The main difference between the  
69 two sensor types is the spatial-spectral filtering provided by the Bayer filter array, which  
70 encodes recorded images into sparse red, green, and blue channels. While the decoding  
71 processes follows a standard demosaicing procedure (individual RGB channels are interpolated  
72 and stacked into a 3D matrix), the loss in image information due to sparse sampling requires  
73 special treatment within the FPM reconstruction algorithm. We address the sparse sampling  
74 problem and present new robust algorithms for calibrating the 3D printed system for high-  
75 quality image reconstruction. In addition, the *Raspberry Pi* single-board computer used for  
76 controlling the camera and illumination LEDs performs autonomous data acquisition,  
77 providing portability and compactness, such as is required for use inside incubation systems.

78 In the next section, simulations to study the impact of the Bayer filter array and the  
79 experimental results from our system are presented. Implications of the results and future  
80 directions are discussed in the later sections. The methods section includes descriptions of the  
81 experimental setup, data-acquisition, data processing and calibration procedures. We also  
82 include the necessary CAD files and an instruction set to build the FPM presented in this article  
83 (supplementary material S1).

84

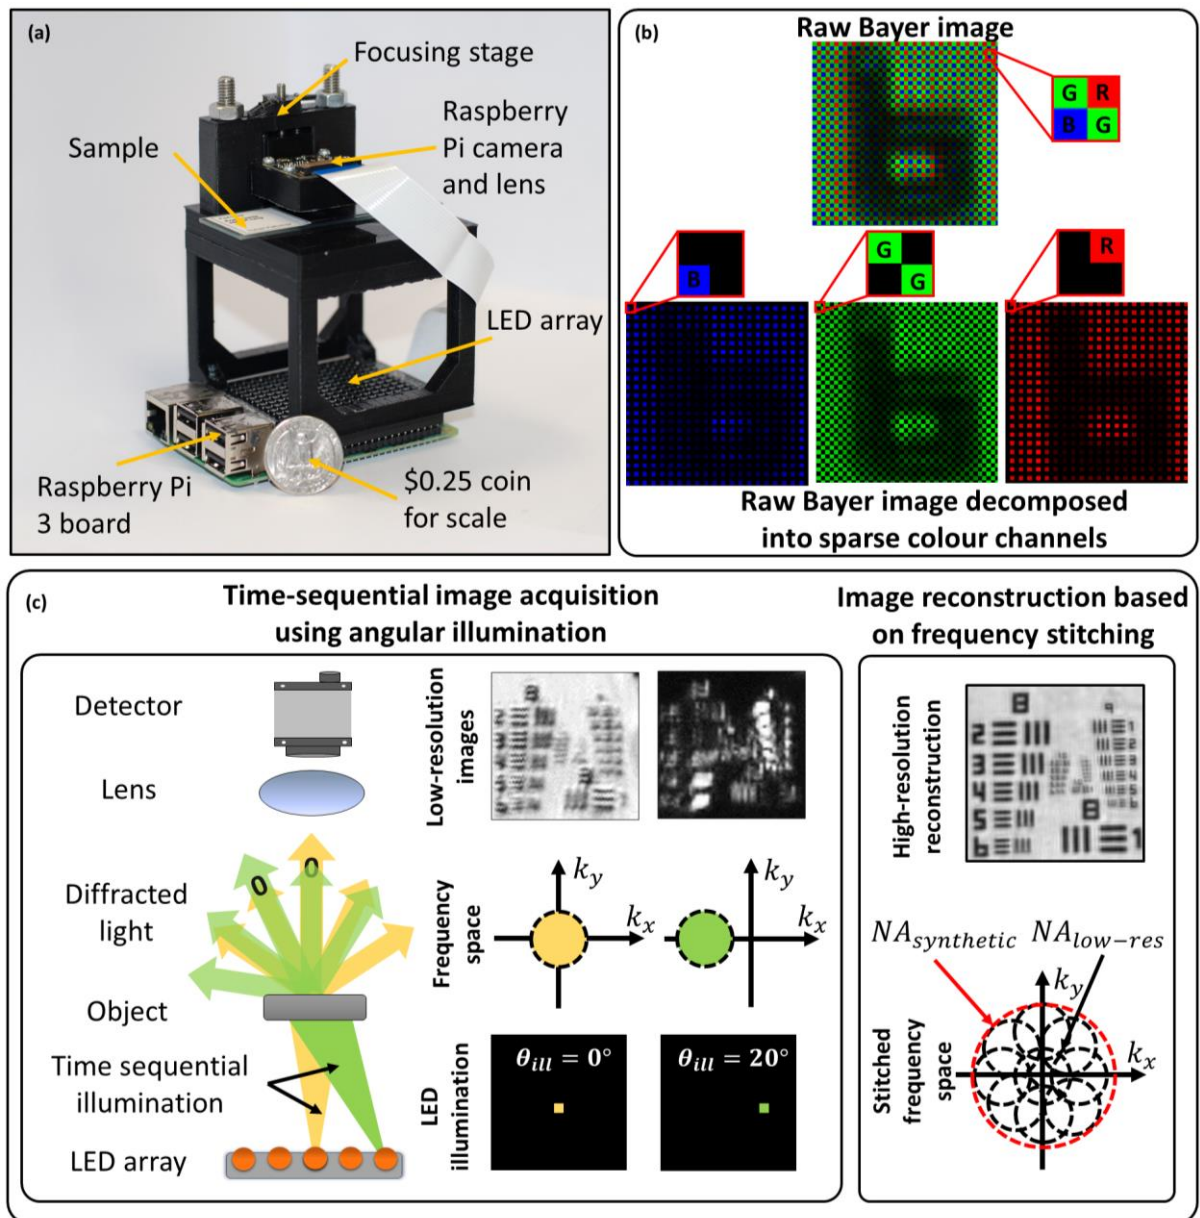

85

86 Figure 1. (a) Experimental setup next to a quarter US dollar for scale. *Raspberry Pi* 3 single-board  
 87 computer board (placed at the bottom) enables wireless image acquisition and data transfer without the  
 88 need for a PC. (b) Bayer color filter array indicating RGGB pixel arrangement. (c) In FPM several low-  
 89 resolution images are obtained in time sequence, each illuminated with a corresponding angle to the object  
 90 illuminated from a different angle. Angular diversity enables to obtain multiple frequency regions, which  
 91 can be stitched together into a single high-resolution, wide-field image.

## 92 Results

93 The *Raspberry Pi* camera (a low-cost device that complements the *Raspberry Pi* computer)  
 94 employs a low-cost CMOS sensor, such as is typically found in mobile phones. It employs a  
 95 Bayer filter (red, green and blue filters arranged on a 2D matrix in a 2x2 RGGB pattern [22]  
 96 (Fig. 1(b))). This divides pixels on the sensor between the three color-filters resulting in  
 97 sparsely sampled images: red channel – 75% empty pixels, green channel – 50% empty pixels  
 98 and blue channel – 75% empty pixels. The empty pixels are demosaiced (using bilinear  
 99 interpolation) to produce a perceptually acceptable photographic image.

100 In FPM, the reconstruction algorithm [18] (see Methods) involves a step to iteratively  
101 recover amplitude and phase of the low-resolution images, where the estimated amplitude is  
102 replaced by the experimentally obtained images. In color cameras, the experimental image has  
103 empty pixels (due to the Bayer filter) whose values are unknown. We have considered two  
104 approaches for mitigation of the sparse sampling due to the Bayer filter. The first, a *sparsely-*  
105 *sampled reconstruction* (SSR) algorithm [23], updates only the non-empty image pixels,  
106 relying on the FPM reconstruction to estimate the empty image pixels. This approach increases  
107 the number of unknowns in the system and can have slower convergence or failure to converge.  
108 In a second approach, the empty pixels are estimated instead from demosaicing enabling the  
109 use of a conventional FPM recovery; we refer to this approach as *demosaiced reconstruction*  
110 (DR). With DR the interpolation errors introduced in demosaicing can introduce artefacts in  
111 the reconstruction. We report below a comparison of image-recovery accuracy using SSR and  
112 DR recovery applied to simulated data.

113 Convergence of the FPM reconstruction algorithms requires the experimental design  
114 conditions to satisfy Nyquist sampling of the image by the detector array and to have  
115 approximately 50% overlap between the frequency bands selected by adjacent illumination  
116 angles (Fig. 2(c2)) [24]. We assess here using simulations, how these requirements are  
117 modified by the reduced sampling rate associated with the sparse sampling of the Bayer matrix.  
118 Image quality is compared to recovery from non-Bayer-encoded images.

119 Using the far-field approximation [15], the image intensity for a color channel can be  
120 written as

$$I(x, y) = \left| \text{F}^{-1} \left\{ P(k_x, k_y) \cdot \text{F} \left\{ A(x, y) e^{i\phi(x, y)} \right\} \right\} \right|^2 \cdot B(x, y) + N(x, y) \quad (1)$$

121 where  $(k_x, k_y)$  are coordinates in frequency space,  $(x, y)$  are coordinates in real space,  $P$  is the  
122 pupil function,  $A$  and  $\phi$  are the amplitude and phase distributions of the input object  
123 respectively,  $B$  is a binary mask corresponding to the color channel's filter arrangement on the  
124 RGGB Bayer matrix,  $N$  is the added Gaussian image noise and  $\text{F}$  is the Fourier transform  
125 operator. Since robustness of the reconstruction is strongly dependent on the aberrations  
126 present in the pupil plane, they were simulated by including defocus and spherical optical  
127 aberrations generated using Zernike polynomials. We employed the Root-Mean-Squared  
128 (RMS) error between high-resolution reconstructed image and the expected ideal simulated  
129 image as a metric of image quality. We employed 150 iterations, which was more than  
130 sufficient for the FPM algorithms to converge.

131 In an imaging system, the image-sampling frequency is defined as  $f_{\text{sampling}} = M/PS$ ,  
132 where  $M$  is the magnification and  $PS$  is the pixel size. This sampling frequency must satisfy  
133 the Nyquist sampling criterion, defined as twice the optical cut-off frequency, to avoid aliasing:

$$f_{\text{sampling}} \geq f_{\text{Nyquist}} = 2f_{\text{cut-off}} = 2NA_{\text{obj}}/\lambda \quad (2)$$

134 The image-sampling frequency can be controlled in the experimental design by modifying the  
135 magnification since the pixel size is fixed by the camera sensor characteristics. To achieve the  
136 widest FOV possible without aliasing, the sampling factor ( $f_{\text{sampling}}/f_{\text{Nyquist}}$ ) must be unity.  
137 For Bayer sensors, intuitively the effective pixel width is  $2\times$  larger due to the empty pixels in  
138 each color channel of the Bayer filter array, hence, the magnification needs to be increased by  
139 a factor of two compared to a monochrome detector array to compensate, i.e., the required  
140 sampling factor will be two. Since increasing the magnification reduces the FOV, simulations  
141 were performed (Fig. 2 (b)) to assess whether the FPM reconstruction methods could converge  
142 with under-sampling to achieve the highest SBP.

## 143 Comparison of FPM reconstruction techniques for Bayer images

144 Sparsely-sampled reconstruction has been shown to be effective for aliased images with 75%  
145 sparsity [23], offering an advantage in terms of maximum achievable SBP compared to  
146 demosaiced reconstruction. However, as can be seen in Fig. 2(a), the image reconstruction from  
147 Nyquist-sampled Bayer images exhibited large RMS errors of 20-30% compared to 10% for  
148 non-Bayer images. Reduced image quality for reconstruction from Bayer-sampled images is  
149 expected due to aliasing artefacts; however, these findings differ from the conclusions in [23]:  
150 probably due to practical differences in implementation, which did not involve compensation  
151 of optical aberrations and benefitted from low-noise data recorded by science-grade cameras.  
152 This enabled reconstruction of high-resolution images from data with 75% sparsity. However,  
153 in our implementation recovering the system aberrations and dealing with the detector read  
154 noise is crucial, hence, both SSR and DR reconstruction methods require an additional  $2\times$   
155 magnification to satisfy the Nyquist sampling criterion.

156 In Fig. 2(c1), the requirement for overlap between the spatial frequencies recorded by  
157 two adjacent LEDs is assessed. It suggests that RMS errors for SSR start to converge at  $\sim 40\%$   
158 overlap compared to  $50\%$  for DR; this is in agreement with the requirements for non-Bayer  
159 sensors [24]. Since the additional  $2\times$  magnification is used in these simulations, the frequency  
160 overlap requirement achieved is similar to the requirement for non-Bayer systems. Using these  
161 two optimal system parameters ( $2\times$  additional magnification and a  $70\%$  frequency overlap),  
162 the overall convergence for DR and SSR and non-Bayer systems is compared in Fig. 2 (d). It  
163 can be observed that DR has better convergence and pupil recovery than SSR. The RMS errors  
164 in the final reconstructions are close for DR and SSR, hence it can be concluded that DR has  
165 better convergence properties despite both reconstruction techniques resulting in similar  
166 reconstruction quality. All reconstructed images are shown in the supplementary material S2.

167

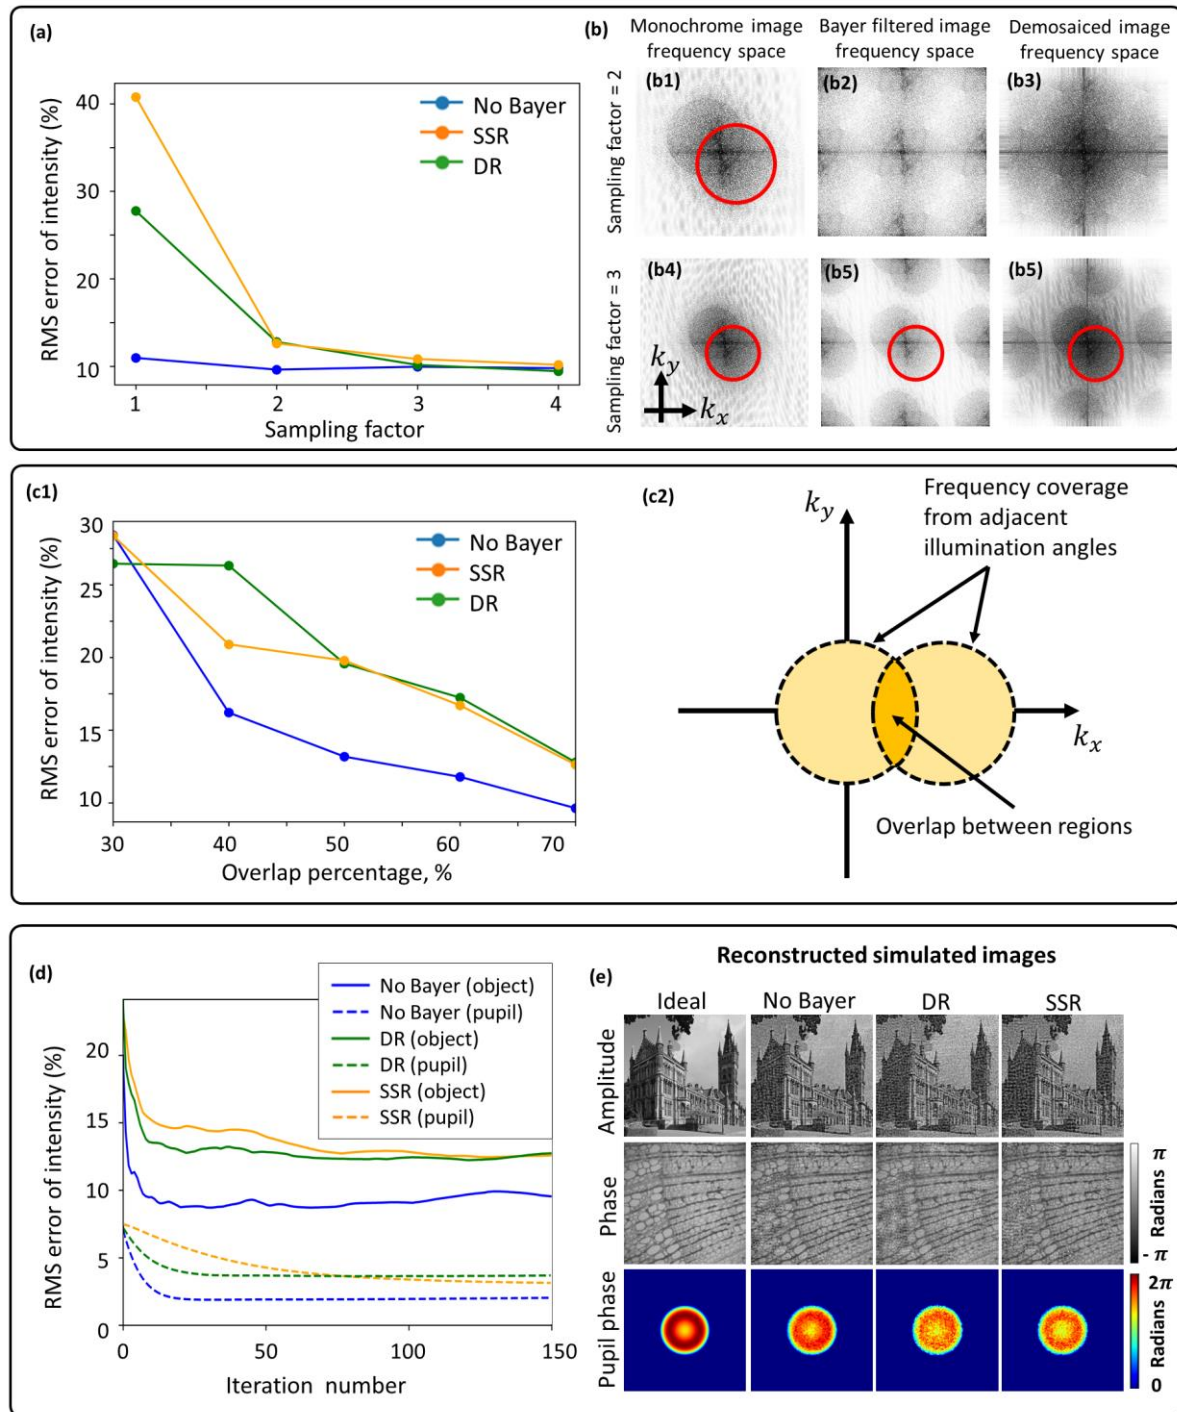

Figure 2. **(a)** Demosaiced and sparsely-sampled reconstruction accuracy for different sampling factors showing that a factor of two is required when using DR and SSR methods; 70% overlap area in the frequency domain. **(b)** Frequency spectra of monochrome and color sensor images showing frequency replicates introduced by the Bayer filter and how it distorts the circular boundary. The boundary becomes undistorted only for a sampling factor of 3. **(c)** Demosaiced and sparse reconstruction accuracy for different frequency overlap percentages together with a diagram explaining what is meant by the overlap percentage between adjacent frequency regions. As expected, accuracy improves as overlap increases. **(d)** Reconstruction convergence plots for object amplitude and pupil phase (70% overlap and sampling factor of 2), indicating better performance of demosaiced reconstruction. **(e)** Reconstructed simulated images.

## 168 Algorithmic self-calibration of LED misalignment

169 Our system is implemented using 3D printed components and intended to be portable; hence,  
170 it may become easily misaligned, affecting primarily the illumination angles (LED positions).  
171 In addition, image distortion and field curvature change the relative LED positions distinctly  
172 across the FOV [25]. We have implemented a recently-developed self-calibration algorithm for  
173 LED position misalignment correction [20], solving the issues of image distortion and  
174 misaligned components with relatively good computational efficiency (see Methods). In this  
175 algorithm the intensity image of an off-axis illuminated brightfield image is Fourier  
176 transformed to produce two overlapping circles, centered around the illumination direction.  
177 Using image processing techniques, we can find centers of these circles providing a better  
178 calibration for the LED positions; hence, the calibration accuracy depends on how well these  
179 circles are delineated.

180 While a sampling factor of two is sufficient (for a monochrome sensor), our simulations  
181 suggest (Fig. 2(b)) that artefacts introduced by the Bayer matrix require the sampling factor to  
182 be around three to produce an undistorted circular boundary, regardless of demosaicing. The  
183 Bayer pattern can be treated as a periodic grating; hence, it produces frequency replicas (similar  
184 to diffraction orders), a type of aliasing artefact, which distort circle boundaries indicated by  
185 Fig. 2(b). Hence, by increasing the sampling frequency, the separation between these frequency  
186 replicas is increased to preserve the boundaries. In practice, the change in illumination  
187 wavelength varies the sampling factor for a fixed magnification since the sampling frequency  
188 is fixed but the Nyquist frequency changes; hence,  $3\times$  sampling factor requirement for red  
189 (630nm) (enough for calibrating LED positions) results in  $2\times$  sampling factor in blue, the  
190 minimum required for overcoming Bayer sampling. This suggests that the red channel can be  
191 used for LED position calibration without losing additional SBP due to the increased sampling  
192 requirement. The FOV is divided into several segments and processed independently in FPM,  
193 hence the distortion is tackled by calculating the relative LED positions for each of these  
194 segments independently (see methods for the recovered distortion of the system).

195

## 196 Experimental results

197 Our FPM device (Fig. 1(a)) achieves high performance at low cost by use of mass-produced  
198 consumer electronics: a conventional mobile-phone-type color camera (with the lens displaced  
199 from the normal infinite-conjugate imaging position to enable short-range imaging), a  
200 *Raspberry Pi* single-board computer for data acquisition and an off-the-shelf LED array  
201 (*Pimoroni Unicorn Hat HD*) for synthesis of a programmable illumination that enables  
202 synthesis of a higher NA. The total component cost is about \$150, but mass production of such  
203 a device would further reduce the component cost. The lens from the *Raspberry Pi Camera*  
204 *v2.0* provides 0.15NA and  $1.5\times$  magnification when placed 7mm from the object. A  $16\times 16$   
205 array of LEDs with 3.3-mm pitch was located 60 mm below the object providing 0.4-NA  
206 illumination to enable synthesis of 0.55-NA FPM images. The FPM yields a 25-megapixel  
207 SBP: that is 870-nm resolution ( $NA = 0.55$ ) - sufficient for sub-cellular imaging across a  $4\text{mm}^2$   
208 FOV. FPM also enables multiple imaging modalities, including phase-contrast and darkfield  
209 imaging, combined with extended DOF and computational aberration correction [26,27].

210 Computational correction of errors due to imperfect calibration (such as component  
211 misalignment and aberrations) is highly dependent on image quality, which is compromised by  
212 the Bayer matrix due to optical attenuation and spectral overlap and spectral leakage between  
213 the RGB channels. While signal-to-noise ratio was maximized by independent optimization of  
214 integration times for each illumination angle, the spectral overlap of the Bayer spectral filters  
215 was mitigated by each red, green and blue LED in a time sequence rather than simultaneously.

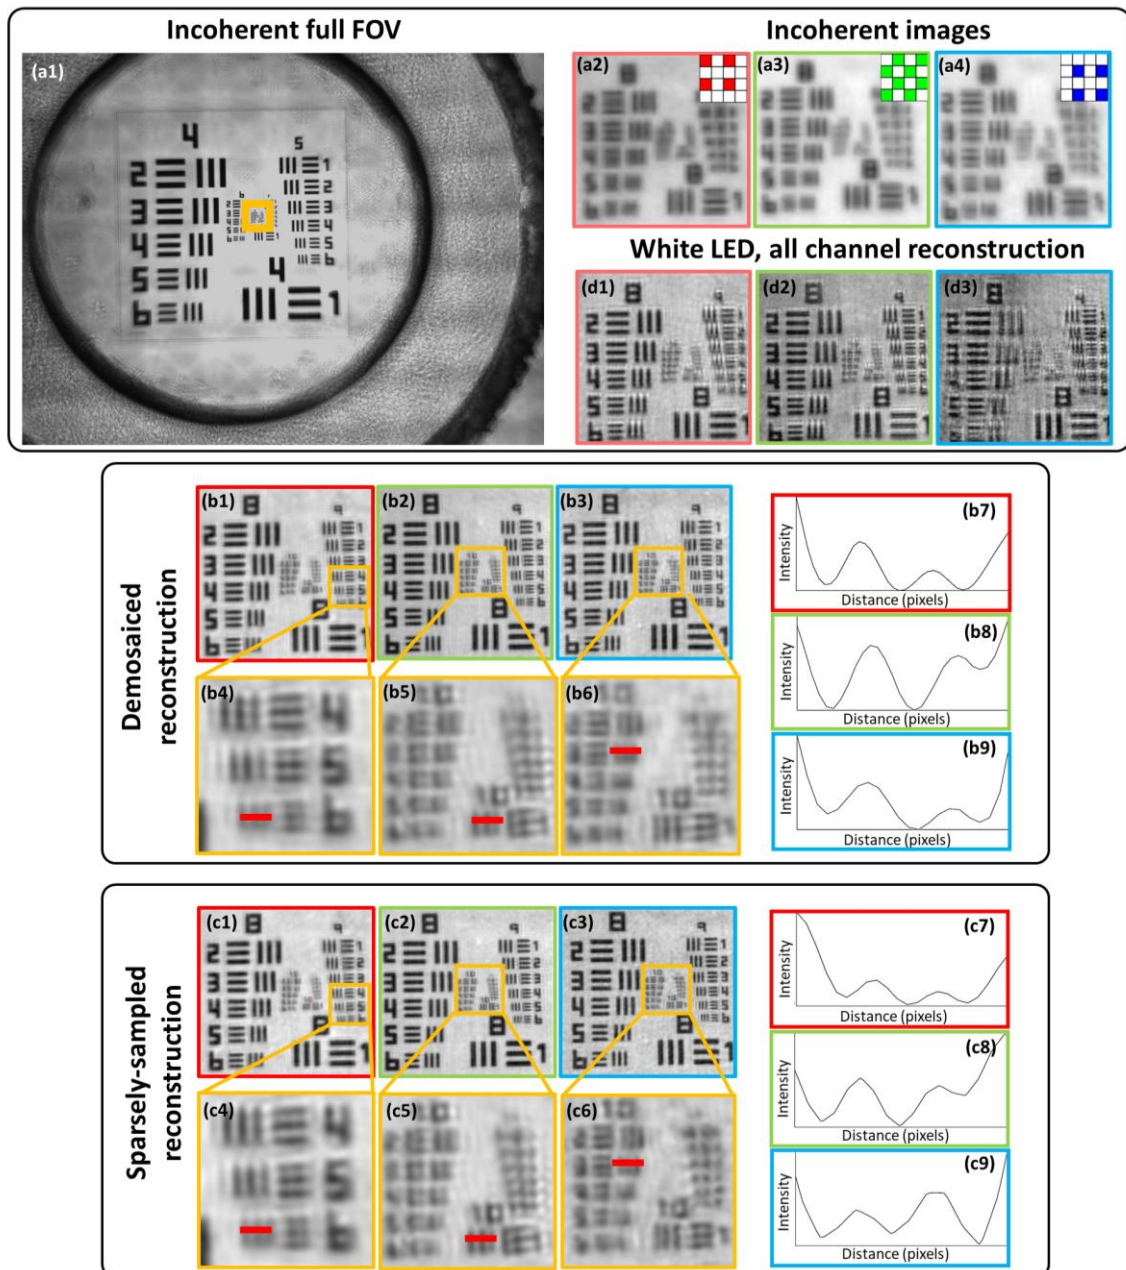

Figure 3. Reconstructions of a USAF resolution chart. (a1-a4) Incoherent raw images. (b1-b9) Demosaiced reconstructions and (c1-c9) sparsely-sampled reconstructions together with line profiles of the smallest resolved USAF target bars. The maximum achieved resolution using the blue LED was 780nm based on group 10 element 3. (d1-d3) Reconstructed images with RGB LEDs used in parallel for illumination demonstrating the reduced reconstruction quality due to the spectral overlap between the color channels. The respective color channels are indicated by the red, green and blue borders of the left, middle and right images

216 We used a standard USAF resolution test chart (Fig. 3(a)) to quantitatively assess the  
 217 performance and resolution improvement. Analysis of the reconstructed images shows a  
 218 resolution improvement from group 8 element 4 (Fig. 3(a3)) to group 10 element 3 (Fig. 3(b6))  
 219 (using 470nm (blue LED) illumination), which corresponds to a three-fold resolution



220 improvement from  $2.8\mu\text{m}$  (incoherent-sum) to  $780\text{nm}$ . This resolution improvement is the  
221 result of the large synthetic NA offered by FPM, which is defined as  $NA_{FPM} = NA_{ill} +$   
222  $NA_{objective}$ . Experimental results agree with the theoretical predictions, which give an increase  
223 in NA from  $NA_{coherent} = 0.15$  ( $NA_{ill} = 0, NA_{objective} = 0.15$ ) to  $NA_{FPM} = 0.55$  ( $NA_{ill} =$   
224  $0.4, NA_{objective} = 0.15$ ). While reconstruction quality shown in Fig. 3(c1-c9, b1-b9) is nearly  
225 identical for both the DR and SSR, the DR offers faster convergence, since the SSR needs to  
226 iteratively recover the missing pixels that are readily available through demosaicing in DR.  
227 The impact of spectral overlap was demonstrated by illuminating the sample using RGB LEDs  
228 simultaneously (white light) and reconstructing each color channel. Artifactual reconstructions  
229 (Fig. 3(d1-d3)) are a result of the broken assumption of monochromatic light that is implicit in  
230 FPM and could be mitigated by a spectral multiplexing algorithm [28].

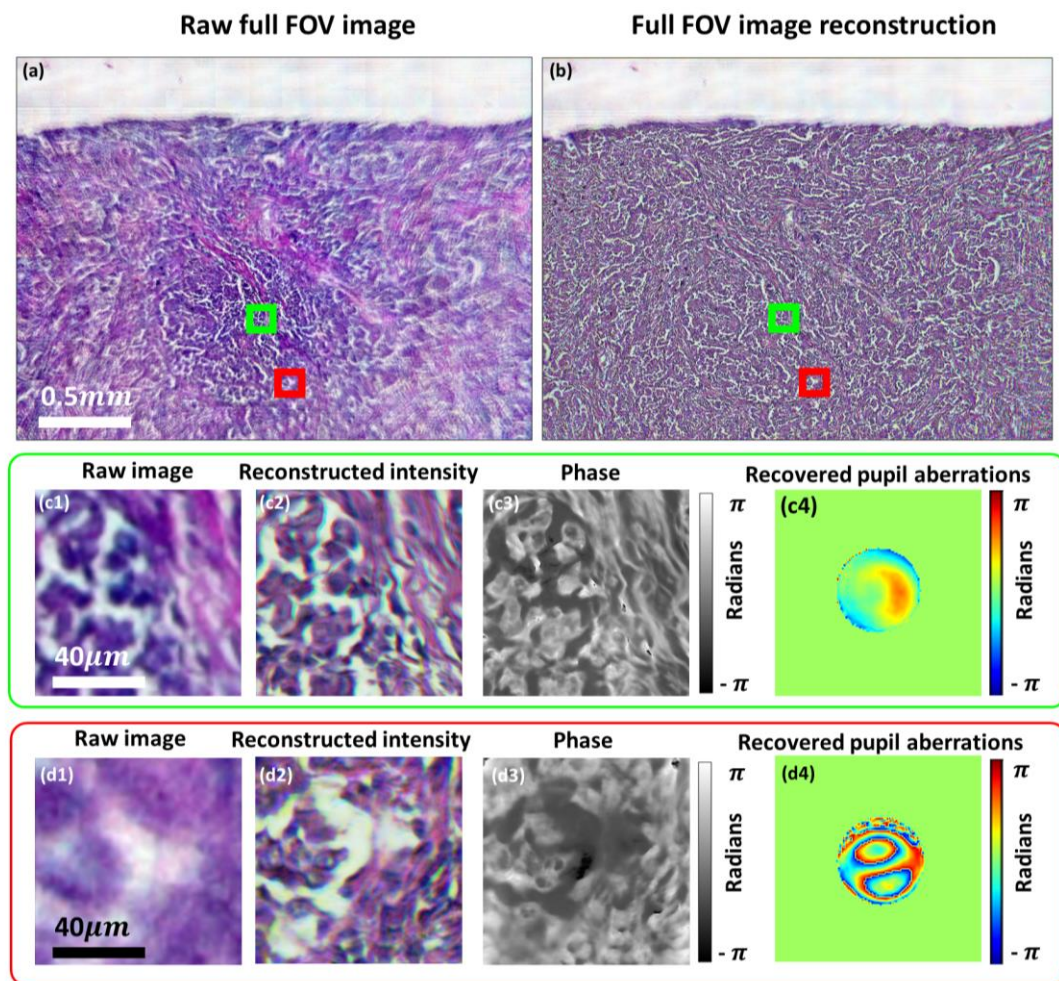

Figure 4. (a) Reconstructed and (b) raw lung carcinoma images. (c1, d1) are the captured raw, low-resolution images and (c2-c3, d2-d3) intensity and phase reconstructions for two different segments of the FOV. (c4, d4) Recovered pupils with aberrations.

231 Lastly, we have demonstrated experimentally that our reconstruction algorithms can  
232 compensate for high-levels of optical aberrations associated with the simple low-cost objective  
233 lens. Reconstructed images of a lung carcinoma (Fig. 4(a,b)) show high-quality reconstruction  
234 across the full FOV despite the presence of off-axis aberrations, which are recovered and  
235 corrected within the reconstruction procedure without requiring additional data. It can be  
236 observed clearly in Fig. 4(d1), that the raw image is severely aberrated compared to (c1), but  
237 the reconstruction (d2) is of similar quality to the central FOV section (c2). The phase images  
238 shown in Fig. 4(c3, d3) demonstrate the capability of imaging unstained samples. It can be

239 seen from Fig. 4(a) that without aberration correction the FOV is limited by aberrations to a  
240 central area of  $\sim 1\text{mm}^2$  while the FPM correction of imaging aberrations increases the usable  
241 area of the FOV by a factor of four.

## 242 Discussion and conclusion

243 We have described the first demonstration of low-cost FPM, enabled by implementation using  
244 consumer-grade color cameras. We achieved a  $4\text{mm}^2$  FOV and  $780\text{nm}$  resolution ( $NA = 0.55$ ),  
245 giving 25-megapixels SBP recovered from 256, 8-megapixel images. Compared to previous  
246 reports of low-cost, mobile microscopes [8] the resolution of our system is a factor of 5 times  
247 better with the added advantage of a 4-times longer working distance (due to the low-NA  
248 lenses). Compared to systems where mobile-phone cameras are equipped with expensive  
249 microscope objectives [12] our microscope offers 100-fold larger FOV without sacrificing  
250 resolution. Compared to a previously demonstrated 3D-printed FPM [21], we report an  
251 increase in the FOV area by a factor 5 and resolution by almost a factor of 2, while the use of  
252 a color sensor instead of a more specialist monochrome sensor reduced the cost by 1-2 orders  
253 of magnitude. The improved performance of our system is made possible by improved  
254 aberration correction and calibration strategies capable of coping with simple, low-cost  
255 components [23]. It should be noted that (1) due to the additional magnification required by  
256 the Bayer filtering, the effective SBP achieved from each 8-megapixel image is only 2  
257 megapixels and (2) the 25 megapixels SBP corresponds to the number of pixels in the image,  
258 but each pixel in the reconstructed image contains both amplitude and phase information.  
259 Although the recording of 256 images may seem a high number, this degree of redundancy is  
260 typical and necessary with FPM [14], but can be reduced by a factor of up to 10 by using  
261 illumination multiplexing [29].

262 Our stand-alone microscope weighs only 200 grams and has external dimensions of  $6\text{cm}$   
263  $\times 9\text{cm} \times 11\text{cm}$ . Data acquisition is autonomous offering major cost-savings and is ideal for  
264 applications such as cell-culture studies or point-of-care-testing applications that require field-  
265 portable devices. The *Raspberry Pi 3* computer-board enables wireless image acquisition, data  
266 transfer, and has potential for on-board FPM-based image reconstruction. Since image  
267 reconstruction is currently a computationally-intensive process we transferred the data to an  
268 external PC for processing, but in practice it would be possible to transfer the data onto a server  
269 network to perform the computations. Also, the use of a trained neural network for image  
270 recovery has been shown to improve image reconstruction speed by up to 50 times [30], which  
271 is particularly attractive for systems with lower computational power. However, neural network  
272 use for medical applications requires an investigation into the availability of training datasets,  
273 or data overfitting [31].

274 One major shortcoming of FPM is the time-sequential data acquisition, but image  
275 acquisition time of  $<1\text{s}$  has been demonstrated in FPM using LED multiplexing [18,29], which  
276 offers potential for an order-of-magnitude improvement in imaging speed. Techniques such as  
277 multi-aperture Fourier ptychography [32,33] can further increase throughput, as is essential for  
278 fast biological processes. Reduced image-acquisition times are also facilitated by replacement  
279 of the planar LED array with a dome-shaped array [34], where all LEDs are oriented towards  
280 the sample offering improved illumination efficiency. Lastly a further factor of 6 increase in  
281 data acquisition speeds could be achieved by removing the high latency introduced during  
282 sequential read-out of our CMOS cameras.

283 We have demonstrated that Fourier ptychography can be performed by using low-cost  
284 commercial-grade Bayer color sensors, off-the-shelf consumer components and 3D-printed  
285 parts. This is enabled by robust pre-processing and reconstruction strategies. Moreover, we

286 used a *Raspberry Pi 3* single-board computer for image acquisition and image transfer. The  
287 result is a highly compact, stand-alone microscope, with a component cost of \$150, that is  
288 capable of wide-FOV, high-resolution imaging. The proposed microscope is suitable for cell-  
289 culture studies (its compactness enables it to fit inside an incubating chamber) and point-of-  
290 care diagnostics. Due to the simplicity of our setup, it is suitable for use as a teaching tool for  
291 computational optics in undergraduate labs and in research labs for conducting further research  
292 in FPM.

## 293 **Methods**

### 294 **Experimental setup**

295 Instructions for construction of our microscope shown in Fig. 1(a) can be found in  
296 supplementary material S1. To minimize the cost of our microscope we used easily accessible  
297 off-the-shelf, low-cost components. We chose a finite-conjugate microscope design because it  
298 requires only a single lens. Sample and focusing stages were custom designed and 3D-printed  
299 using a *Ultimaker 2+* 3D printer. A *Raspberry Pi V2 NOIR* camera module was used (8  
300 megapixels, 1.12 $\mu$ m pixel size) which contains a 3-mm focal-length camera lens, which was  
301 remounted and displaced from the sensor to achieve  $\sim 1.5\times$  magnification. Frequency overlap  
302 of  $\sim 70\%$  was obtained by placing the *Unicorn HAT HD* 16x16 LED array (3.3mm pitch) 60mm  
303 below the sample stage. The RGB LED array has peak illumination wavelengths of 623nm,  
304 530nm, and 470nm. The low-resolution microscope has 0.15 NA (providing 5- $\mu$ m resolution  
305 at 470nm),  $2.42\times 1.64\text{mm}^2$  FOV, and a 7-mm working distance. The synthetic NA achieved  
306 after FPM reconstruction was 0.55. Since the lens is used away from the intended infinite-  
307 conjugate position, the aberrations become progressively more severe toward the edges of the  
308 FOV. This could be mitigated by use of two back-to-back, co-aligned lenses [8] with the  
309 penalty of reduced working distance and added experimental complexity.

### 310 **Data acquisition**

311 Experimental low-resolution images were obtained using all 256 LEDs in the LED array. The  
312 *Python 3.6* programming language was used for the image acquisition via *picamera*  
313 package [35], which enables the capture of raw 10-bit Bayer images [36]. Adaptive integration  
314 times for individual LEDs (longer for the off-axis LEDs towards the edges of the array) enabled  
315 enhancement of the dynamic range and image signal-to-noise ratio. We chose to transfer all  
316 256 images obtained by the microscope from the *Raspberry Pi 3* computer onto a desktop  
317 *Windows* computer to speed up the reconstruction. Reconstruction could also be performed on  
318 the *Raspberry Pi* with necessary optimization of recovery algorithms.

### 319 **Image reconstruction**

320 Recorded images were demosaiced using bilinear interpolation from the *OpenCV* processing  
321 package [37] within the *Python 3.6* programming language. Before the reconstruction, the  
322 images were pre-processed by subtracting dark-frames to remove fixed pattern noise and all  
323 images were normalized according to their exposure times. The pre-processed images were  
324 divided into 128x128 pixel sub-images with an overlap of 28 pixels between adjacent image  
325 segments to aid in seamless stitching of the high-resolution reconstructions. Finally, LED-  
326 position calibration is performed independently on each image segment as described in the next  
327 section.

328 The FPM reconstruction algorithm is performed on each section of the FOV referred to  
329 as  $I^{(i)}(\mathbf{r})$ , where  $\mathbf{r}$  is the coordinate vector in object space and  $i$  is the index corresponding to  
330 the LED used to illuminate and obtain the image. Before the reconstruction a high-resolution,  
331 wide-field object  $o(\mathbf{r})$  and its Fourier spectrum  $O(\mathbf{k}) = \mathcal{F}\{o(\mathbf{r})\}$  are initialized by  
332 interpolating one of the low-resolution images to the required dimensions, where  $\mathbf{k}$  is the

333 coordinate vector in k-space and  $\mathcal{F}$  is the Fourier transform operator. The reconstruction steps  
 334 described below are repeated for multiple iterations and within an  $n^{\text{th}}$  iteration, images obtained  
 335 from illumination angles  $i$  are stitched together using the following steps:

336 1. Create a low-resolution target image Fourier spectrum estimate  $\Psi(\mathbf{k})$  by low-  
 337 pass filtering the high-resolution, wide-field spectrum estimate with the pupil  
 338 function  $P(\mathbf{k})$

$$\Psi_n^{(i)}(\mathbf{k}) = O_n(\mathbf{k} - \mathbf{k}_i)P_n(\mathbf{k}) \quad (2)$$

339 where  $\mathbf{k}_i$  is the k-space vector corresponding to angular LED illumination with  
 340 an index  $i$ .

341 2. Create a low-resolution target estimate  $\psi_n^{(i)}(\mathbf{r}) = \mathcal{F}^{-1}\{\Psi_n^{(i)}(\mathbf{k})\}$  and use it to  
 342 create the updated low-resolution estimate  $\phi_n^{(i)}(\mathbf{r})$  by replacing its amplitude  
 343 with the experimentally obtained one

$$\phi_{n,\text{SSR}}^{(i)}(\mathbf{r}) = \left( \sqrt{I^{(i)}(\mathbf{r}) \cdot B(\mathbf{r})} + |\psi_n^{(i)}(\mathbf{r}) \cdot (1 - B(\mathbf{r}))| \right) \frac{\psi_n^{(i)}(\mathbf{r})}{|\psi_n^{(i)}(\mathbf{r})|} \quad (3)$$

344 where  $B(\mathbf{r})$  is the binary Bayer matrix for the color channel being reconstructed.  
 345 This is required if SSR is used [23], otherwise, if DR is being used then setting  
 346  $B(\mathbf{r}) = 1$  results in the standard amplitude update step

$$\phi_{n,\text{DR}}^{(i)}(\mathbf{r}) = \sqrt{I^{(i)}(\mathbf{r})} \frac{\psi_n^{(i)}(\mathbf{r})}{|\psi_n^{(i)}(\mathbf{r})|} \quad (4)$$

347 3. Create an updated low-resolution Fourier spectrum  
 348

$$\Phi_n^{(i)}(\mathbf{k}) = \mathcal{F}\{\phi_n^{(i)}(\mathbf{r})\}. \quad (5)$$

349 4. Update the high-resolution object Fourier spectrum  $O(\mathbf{k})$  using a second-order  
 350 quasi Newton algorithm [38] together with embedded pupil recovery  
 351 (EPRY) [16] and adaptive steps-size [39] schemes to improve convergence

$$O_{n+1}(\mathbf{k}) = O_n(\mathbf{k}) + \alpha^n \frac{|P_n(\mathbf{k} + \mathbf{k}_i)|P_n^*(\mathbf{k} + \mathbf{k}_i)}{|P_n(\mathbf{k})|_{\max} (|P_n(\mathbf{k} + \mathbf{k}_i)|^2 + \delta_1)} \Delta, \quad (6)$$

$$P_{n+1}(\mathbf{k}) = P_n(\mathbf{k}) + \beta^n \frac{|O_n(\mathbf{k} - \mathbf{k}_i)|O_n^*(\mathbf{k} - \mathbf{k}_i)}{|O_n(\mathbf{k})|_{\max} (|O_n(\mathbf{k} - \mathbf{k}_i)|^2 + \delta_2)} \Delta, \quad (7)$$

$$\Delta = \Phi_n^{(i)}(\mathbf{k}) - \Psi_n^{(i)}(\mathbf{k}), \quad (8)$$

352 where  $\delta_1, \delta_2$  are regularization parameters and  $\alpha, \beta$  are adaptive-step size  
 353 constants which are selected to improve convergence. More details on the pupil-  
 354 aberration recovery framework are given in the following sections.

355 All reconstructed sections were stitched together to produce a full-FOV reconstructed  
 356 image. Alignment and contrast variations were corrected prior to stitching. Histogram  
 357 equalization with the central section is performed to remove contrast variations across the FOV  
 358 for both amplitude and phase. Finally, all sections are blended together using *ImageJ* (using  
 359 the *Fiji* plugin package) [40] to produce full-FOV images with seamless stitching.

360 All steps described above were performed for each of the red, green and blue channels  
361 independently and the final color image was assembled using linear image alignment with the  
362 scale-invariant feature transform (SIFT, part of the *Fiji* plugin package within *ImageJ*) [40] for  
363 each channel and mapping them into RGB color panes.

364

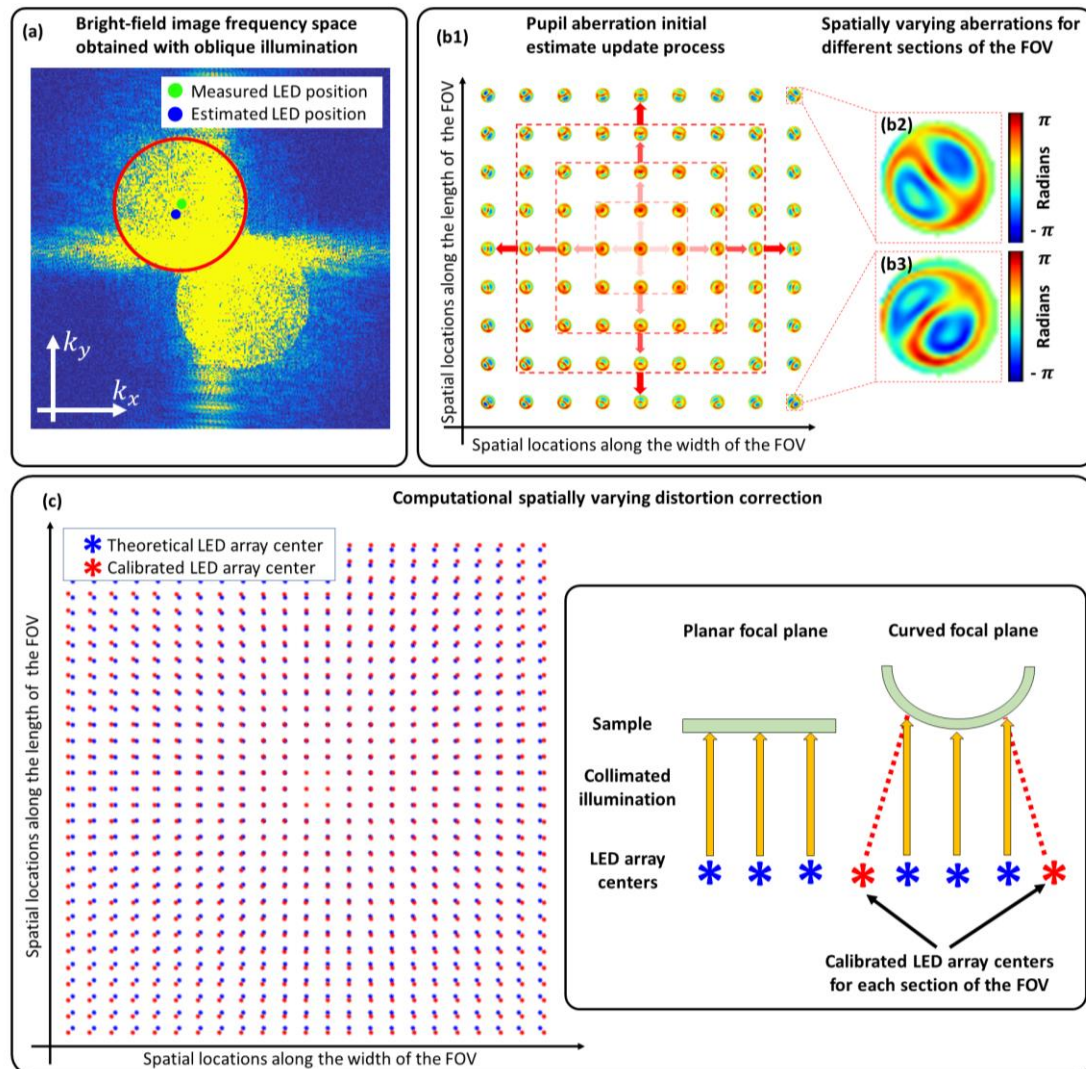

Figure 5. (a) Frequency space of a brightfield image obtained using an oblique illumination angle. Blue and green dots indicate initial and corrected LED positions respectively. (b1) Aberrations recovered from each section are used as initial estimates for neighboring sections, starting from the center of the FOV towards the edges. (b2, b3) Examples of recovered aberrations throughout the full-FOV indicating spatially-varying aberrations. (c) Implementing LED calibration on each segment across the FOV enabled us to find the spatially varying distortion by measuring the global LED position shift.

### 365 Computational calibration of LED positions

366 An LED self-calibration method based on frequency-spectrum analysis of bright-field  
367 images [20] was used to locate pupil positions in spatial-frequency space for every 128x128  
368 pixel section of the image, in order to accurately estimate the angle of illumination at the sample  
369 associated with each LED. A microscope objective acts as a low-pass filter and off-axis  
370 illumination shifts the frequencies in the object plane corresponding to the frequencies  
371 transmitted by the objective, enabling recording of higher spatial frequencies. These higher  
372 frequencies within the brightfield region appear as two overlapping circles in the Fourier

373 transform of the intensity image, centered at the spatial frequency of the illumination angle.  
374 Finding the center of these circles yields the LED positions with sub-pixel accuracy, for every  
375 brightfield illumination angle [20] (Fig. 5(a)). After finding position displacements for each  
376 bright-field LED, a homographic transformation matrix that best represents the misalignment  
377 of the LED array is derived. This transformation matrix is applied to dark-field LEDs as well.  
378 However, non-linear distortions, such as field curvature [25], make LED positions appear to  
379 be distorted differently across the FOV. To mitigate this problem, we split the full FOV image  
380 into 128x128 pixel sections and apply LED calibration for each section individually. If non-  
381 linear distortions are present, then each section will have a different LED array translation  
382 shown in Fig. 5(c). These distortions were corrected using an affine transformation that best  
383 represents corrections for each section of the FOV.

#### 384 Computational aberration correction

385 Spatially-varying aberrations for each segment of the FOV are recovered using the EPRY  
386 algorithm [16] to enable FPM reconstruction of the images. However, our microscope suffers  
387 from aberrations that increase progressively towards the edges of the FOV, and the EPRY  
388 algorithm fails for the more highly aberrated sections. A good initial estimate of the aberrations  
389 is required for the EPRY algorithm to converge. Therefore, starting with the central 128x128  
390 section of the FOV, we run the EPRY recovery step for 40 iterations, reset the recovered image  
391 intensity and phase while retaining the aberrations, and iterate the algorithm for 3 more times.  
392 The reset step forces the algorithm to escape from local minima and enables convergence  
393 towards a global solution. We use the recovered central aberrations as an initial estimate for  
394 the surrounding sections (Fig. 5(b)). This update process continues until aberrations for every  
395 section of the FOV are recovered.

396 Low-cost lenses, such as the ones we have used, tend to suffer from severe chromatic  
397 aberrations. We found that when the microscope is focused using one color of LED, the  
398 chromatic aberration (primarily defocus) for images recorded using other colors was significant  
399 to cause the reconstruction algorithms to fail. The aberrations recovered from the central  
400 section of the color where the microscope is focused are used as an initial estimate for the  
401 defocused color that is being processed. This involved decomposition of recovered pupil  
402 aberrations into 30 Zernike coefficients using the singular value decomposition function in  
403 *MATLAB* from which the chromatically-aberrated pupil functions were estimated.

404

# 405 Supplementary material 1: 406 Instructions to build a *Raspberry Pi* 407 Fourier ptychographic computational 408 microscope

409 This document provides instructions to build a low-cost computational microscope reported in  
410 the manuscript: “*Low-cost, sub-micron resolution, wide-field computational microscopy with*  
411 *Raspberry Pi hardware*”. The CAD files and data acquisition codes can be downloaded from  
412 <http://dx.doi.org/10.5525/gla.researchdata.594>.

## 413 Introduction

414 One of the aims when building this microscope was to use only off-the-shelf components that  
415 can be easily bought anywhere and to design the microscope in such a way that it could be  
416 assembled with minimal external components. Avoiding complexity allowed us to build a very  
417 low-cost and robust microscope, which can be assembled and used with opensource software.  
418 Designs for the parts were made using *OpenSCAD* open source CAD software and printed with  
419 *Ultimaker 2+* 3D printer.

420 The microscope was designed around the [Raspberry Pi 3](#) computer board due to a wide  
421 opensource community and the support available. The computer itself has a CSI port to which  
422 a [Raspberry Pi camera](#) can be connected. For the illumination we used a [Unicorn HAT HD](#)  
423 16x16 LED array, which is an add-on designed for the *Raspberry Pi* boards. It mounts directly  
424 onto the GPIO pins on top of the board. Camera and the LED board can be connected and  
425 controlled easily via opensource libraries available for *Python* or C++ programming languages.

426 Furthermore, *Raspberry Pi* camera comes mounted with a mobile-phone-camera type  
427 lens. It was unscrewed from the camera and used as our microscope objective. The component  
428 list required to build the setup is provided below, along with a step-by-step instruction set for  
429 assembly and operation of the microscope.

430

431 **Component list**

| <b>Off-the-shelf components</b>                                                       | <b>Quantity</b> | <b>Purpose</b>                                                     |
|---------------------------------------------------------------------------------------|-----------------|--------------------------------------------------------------------|
| Raspberry Pi 3 computer board                                                         | 1               | Controlling the camera and LED array; image capture and storage    |
| 20mm long M3 screws                                                                   | 4               | Fix Raspberry Pi computer board to a stable base                   |
| Unicorn HAT HD 16x16 LED array                                                        | 1               | Illumination source                                                |
| Raspberry Pi V2.1 NoIR camera                                                         | 1               | Image sensor                                                       |
| Unscrewed lens from the Raspberry Pi camera (Part 4)                                  | 1               | Microscope objective                                               |
| 3.5mm diameter, >10mm long, 0.25mm pitch screw and bushing (Thorlabs F3ES25, F3ESN1P) | 1               | Used for high-accuracy focusing                                    |
| >40mm long M6 screws + nuts                                                           | 2               | Attaching the focusing stage to the sample stage                   |
| 5.6mm diameter, ~10mm long springs (RS Stock No. 821-431)                             | 2               | Counter balance force for the focusing stage                       |
| 5mm long M1.5 screws                                                                  | 4               | Screwing <i>Raspberry Pi</i> (part 4) camera to the focusing stage |

432 **Supplementary Table S1 1.** List of the off-the-shelf components required to build the microscope.

433

434



## 435 Design

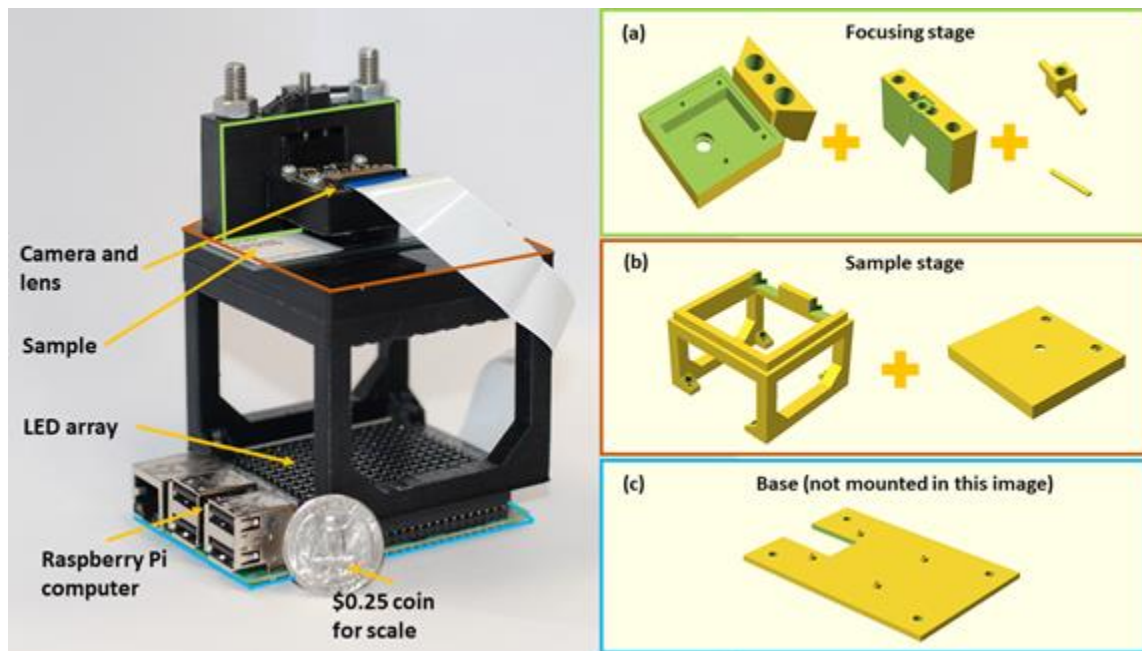

436

437

438

**Supplementary Figure S1 1.** The experimental setup with all the necessary annotations for reference to 3D printed designs.

439 Supplementary Figure S1 1 shows the assembled setup together with 3D printed parts required.  
440 It was built using components described in Supplementary Table S1 1. Once each component  
441 is 3D printed, the assembly is very simple and requires only a few screwdrivers.

### 442 Base

443 The plastic base shown in Supplementary Figure S1 1(c) was printed such that the Raspberry  
444 pi and the sample stage could be screwed onto it. The base itself has 4 holes which can be used  
445 for screwing the microscopes to the optical bench if needed. This was designed to provide  
446 higher stability when longitudinal imaging might be required.

### 447 Sample stage

448 The sample stage shown in Supplementary Figure S1 1(b) was designed to be mounted on the  
449 Raspberry Pi board with an LED array on top. The four screw holes on the 3D printed sample  
450 stage match those found on the Raspberry Pi and the plastic base. All components can be  
451 screwed tightly together to form a single microscope unit.

452 There is another 3D printed part that goes on top of the sample stage legs. It has 3 holes  
453 on it where the central one acts as an aperture for the sample, reducing any stray light and  
454 reflections from the LED array. The other 2 holes were made for screws that attach the focusing  
455 stage to the sample stage.

### 456 Camera holder and focusing stage

457 The focusing stage shown in Supplementary Figure S1 1(a) is composed of four 3D printed  
458 elements.

459 The camera holder module (the first 3D printed part seen in Supplementary Figure S1 1(a))  
460 was designed to mount the microscope objective (the unscrewed camera lens) in place and  
461 screw the camera above it. This was designed for finite-conjugate microscope configuration to

462 be established. The unscrewed lens from the camera has a 1.5mm aperture only on one side;  
463 lens must be mounted such that the aperture is facing downwards (towards the sample). This  
464 compact design was set to achieve 1.5× magnification, but it can be easily modified by  
465 changing the distance between the lens and the detector.

466 The camera holder mount, (the second 3D printed part seen in Supplementary Figure S1  
467 1(a)) serves several purposes including focusing the sample. Firstly, it has rails onto which  
468 camera holder module is mounted and can be moved up or down for focusing. The central hole  
469 in the camera holder mount is for the 0.25mm pitch screw. Springs are fed through the inner  
470 pair of holes in the camera holder mount and the corresponding holes in the camera holder  
471 module. They are held in place by sliding the pins shown in Supplementary Figure S1 1(a)  
472 through each end of both springs. The screw is used to push down on the camera holder module  
473 while the springs and bottom pin provide a counter force to push it upwards. This way the  
474 module can slide along the rails with high-precision, by turning the screw. Springs provide  
475 stability and push the module upwards when the screw does not provide a downward force  
476 anymore, which should minimize the backlash error.

477 Secondly, the outer holes in the camera holder mount enables addition of screws or bolts to  
478 attach the whole focusing module to the top of the sample stage. While the focusing is done  
479 via a translation stage, the sample must be translated by hand. In our setup, the FOV is large  
480 so precise translation is not required; hence, we chose to use this design. However, there are  
481 3D printed sample translation stages available in the opensource community that can be  
482 integrated into our design.

## 483 **Assembly instructions**

484 Access to a 3D printer is required to print several parts required for the assembly. We used  
485 *Ultimaker 2+* with a nozzle size of 0.25mm for the camera holder module and 0.4mm for the  
486 other components. Also, the lens from the *Raspberry Pi V2.0* camera must be unscrewed before  
487 the assembly. Step-by-step instructions to assemble the microscope:

488 1. 3D print all the parts using a printer of your choice. We used *openSCAD* to design, render  
489 and save the designs in .STL format. *CURA* software was used to create the files that can  
490 be read by the *Ultimaker 2+* 3D printer. Black PLA filament and a 0.4mm diameter nozzle  
491 was used for printing the sample stage parts, while a 0.25mm nozzle was used to print the  
492 focusing stage. Our files were designed to match the tolerance of the nozzles on our  
493 printer. The 3D models need to be tweaked when a different nozzle size or a different 3D  
494 printer is used due to change in the tolerances.

495 2. Connect the *Raspberry Pi* camera to the *Raspberry Pi* board.

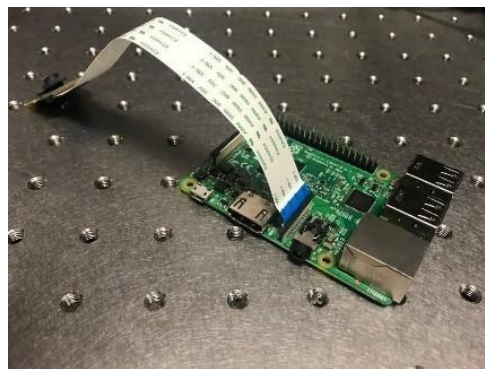

496

- 497 3. Mount the LED array on top of the Raspberry Pi board by plugging it into the GPIO pins  
498 on the board.

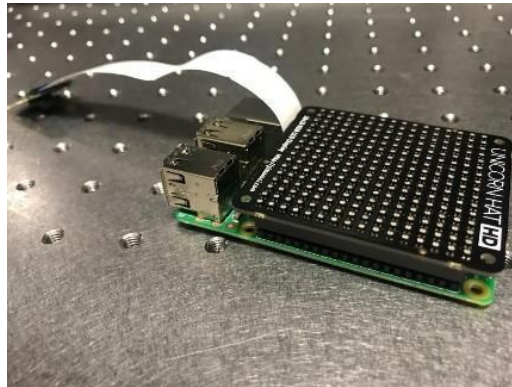

499

- 500 4. Place the sample stage such that the screw holes match the base; making sure that the  
501 sample-stage feet are not on top of any of the LEDs. Then place a nut in each foot of the  
502 sample stage.

- 503 5. Place the spacers in between the *Raspberry Pi* board *UnicornhatHD* board so that they are  
504 aligned with the screw holes and then screw the *Raspberry Pi* board and the sample stage  
505 to the base such that they form a single rigid module.

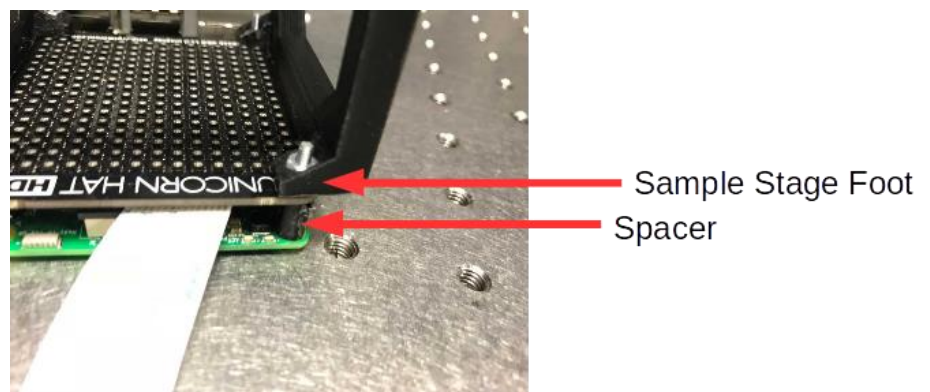

506

- 507 6. Take the camera holder; place the lens in the circular slot with the aperture facing  
508 downwards, towards the sample stage.

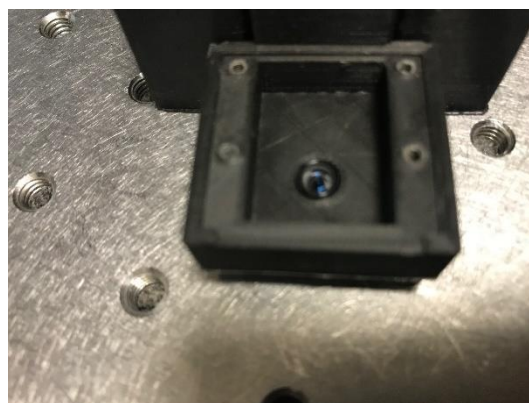

509

- 510 7. Mount the camera, align with the screw holes of the 3D printed camera holder; screw it in  
511 place tightly.

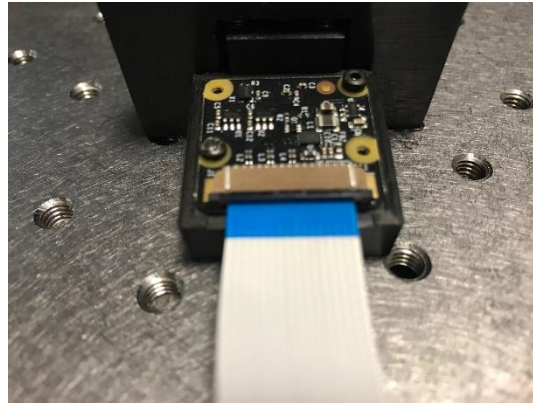

512

513 8. Slide the camera holder module onto the focusing stage rails. Thread the springs through  
514 the holes on the focusing stage and the camera module as shown by a red arrow in the  
515 figure below. Use two 3D printed horizontal pins seen in Supplementary Figure S1 1(a) to  
516 hold the ends of the springs at the top and bottom of the focusing stage; the spring should  
517 be long enough such that it is stretched out and apply a strong counter-balance force to the  
518 screw.

519

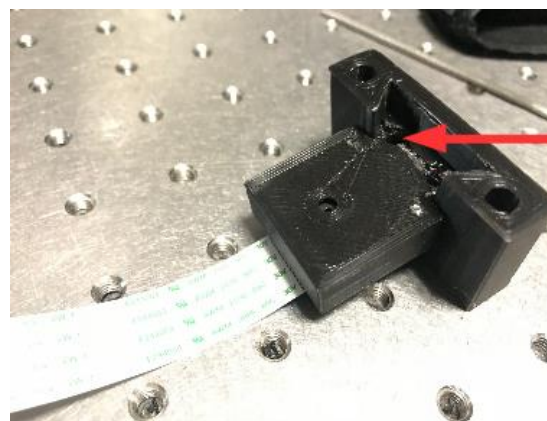

Hole for Spring

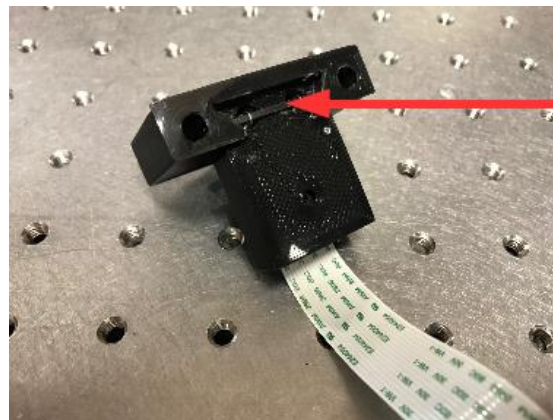

Bottom Pin

520

521 9. Pull down the camera holder module and, from underneath, place the bushing up into the  
522 central hole of the focusing stage. Then, place the screw in the top of the camera holder  
523 mount. Screw it in such that the screw pushes onto the camera holder module.

524

- 525 10. Use screws with nuts to fix the focusing stage tightly to the top plate of the sample stage  
526 from Supplementary Figure S1 1(b)).
- 527 11. Place the focusing stage module onto the sample stage module with the *Raspberry Pi*  
528 computer. The part is designed to have a tight fit, if it is not tight, please adjust the  
529 tolerances.
- 530 12. Optional: connect a screen using the HDMI port.
- 531 13. Optional: connect a keyboard and a mouse.
- 532 14. Optional: Place the *Raspberry Pi* board on top of the 3D printed base; align the base and  
533 the Raspberry Pi such that the screw holes are on top of each other.

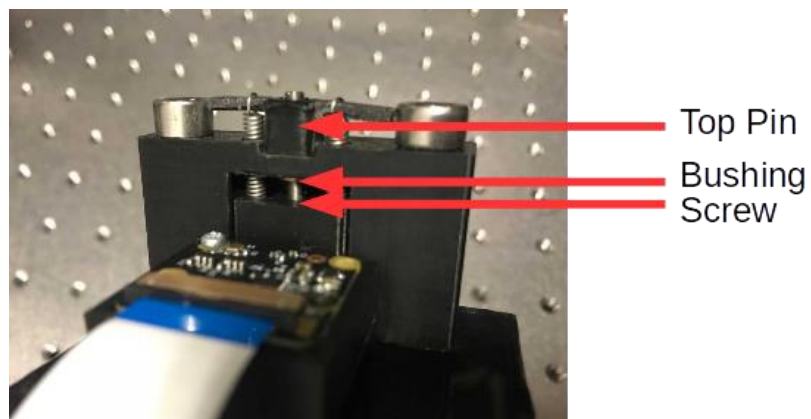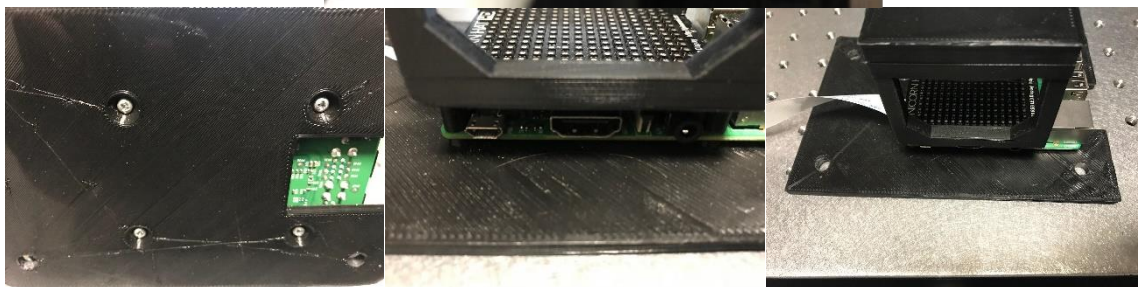

534

## 535 **Operating the Microscope**

### 536 **Installing Software on the Raspberry Pi**

537 Raspbian is a free *Raspberry Pi* operating system available for download from the  
538 [manufacturer's website](#). It can be installed by following the guide listed in the *Links* section.

539 The various interfaces of the Raspberry Pi can be enabled by going to Applications Menu ->  
540 Preferences -> Raspberry Pi Configuration -> Interfaces, and then enabling all options.

541 Image acquisition codes can also be downloaded from the *Links* section. Various python  
542 packages will need to be installed before these can be used. The packages needed are:

- 543 • -Unicornhathd
- 544 • -Numpy
- 545 • -Picamera
- 546 • -Matplotlib
- 547 • -Io
- 548 • -Random

549 • -Fractions

550 These can be installed using the pip package management system or by installing anaconda on  
551 the raspberry pi. However, the [picamera](#) and [unicornhathd](#) packages are not included in  
552 anaconda and will need to be installed separately. Links to the installation guides of these  
553 packages and a more [general guide](#) to installing python packages on the Raspberry Pi are  
554 provided in the *Links* section. Python2 is used for image acquisition so follow instructions for  
555 Python2.7 as opposed to Python3.

## 556 Data Acquisition

- 557 1. Connect the Raspberry Pi to a keyboard, mouse and monitor, and turn it on.
- 558 2. Place the sample on the top plate of the sample stage, underneath the camera  
559 mount.
- 560 3. Use the "Focusing" script to make sure the sample is positioned correctly and in  
561 focus. This script has an option to zoom that can be used if needed. To focus the  
562 microscope, use an Allen key to turn the screw in the focusing stage.
- 563 4. Close the preview and open the "main data acquisition" file.
- 564 5. Adjust the necessary parameters in the data acquisition file and save the file.
- 565 6. Place the microscope in a dark room or cover it, being careful to ensure the sample  
566 is not moved and the focus is not shifted.
- 567 7. Run the data acquisition script
- 568 8. The captured data can be copied by a USB drive or the SD card on the *Pi* can be  
569 inserted into a PC and [disk internals Linux reader](#) can be used to copy the data.
- 570 9. Switch off the Raspberry Pi after data acquisition is complete.

## 571 Links

- 572 • Data acquisition codes and CAD files: <http://dx.doi.org/10.5525/gla.researchdata.594>
- 573 • Raspbian installation guide:  
574 [https://www.raspberrypi.org/documentation/installation/installing-](https://www.raspberrypi.org/documentation/installation/installing-images/README.md)  
575 [images/README.md](https://www.raspberrypi.org/documentation/installation/installing-images/README.md)
  - 576 ○ Needs Etcher software to install Raspbian on the SD Card
  - 577 ○ But first, download the Raspbian image from the above link.
- 578 • Guide to Installing *Python Packages* on *Raspberry Pi*:  
579 <https://www.raspberrypi.org/documentation/linux/software/python.md>
- 580 • *Picamera* installation guide: [http://www.picamera.readthedocs.io/en/release-](http://www.picamera.readthedocs.io/en/release-1.0/install2.html)  
581 [1.0/install2.html](http://www.picamera.readthedocs.io/en/release-1.0/install2.html)
- 582 • *UnicornHatHD* installation guide: <https://www.github.com/pimoroni/unicorn-hat-hd>
- 583 • *Pimoroni Unicorn HD* LED array: <https://shop.pimoroni.com/products/unicorn-hat-hd>
- 584 • *Raspberry Pi V2.1* camera: <https://www.raspberrypi.org/products/camera-module-v2/>
- 585 • *DiskInternals Linux Reader* can be used to read the files on a Linux SD card from a  
586 computer: <https://www.diskinternals.com/linux-reader/>

587

588

## 589 Supplementary material 2: 590 Reconstructions from the simulations

591 Simulations were carried out to compare the reconstruction quality from the sparsely  
592 sampled Bayer filtered images using (1) standard FPM algorithms on demosaiced images and  
593 (2) sparsely sampled FPM reconstruction on raw Bayer data. These reconstruction methods  
594 were applied to investigate their performance for various sampling and frequency overlap  
595 criteria. Simulations for a non-Bayer image sensor (monochrome) are also presented to provide  
596 a reference for the results obtained from a Bayer filtered image sensor (colour). Results are  
597 shown in Supplementary Figure S2 1, Supplementary Figure S2 2, Supplementary Figure S2  
598 3. These are the reconstructed images for data points displayed in the graphs presented in Figure  
599 2 of the main manuscript.

600

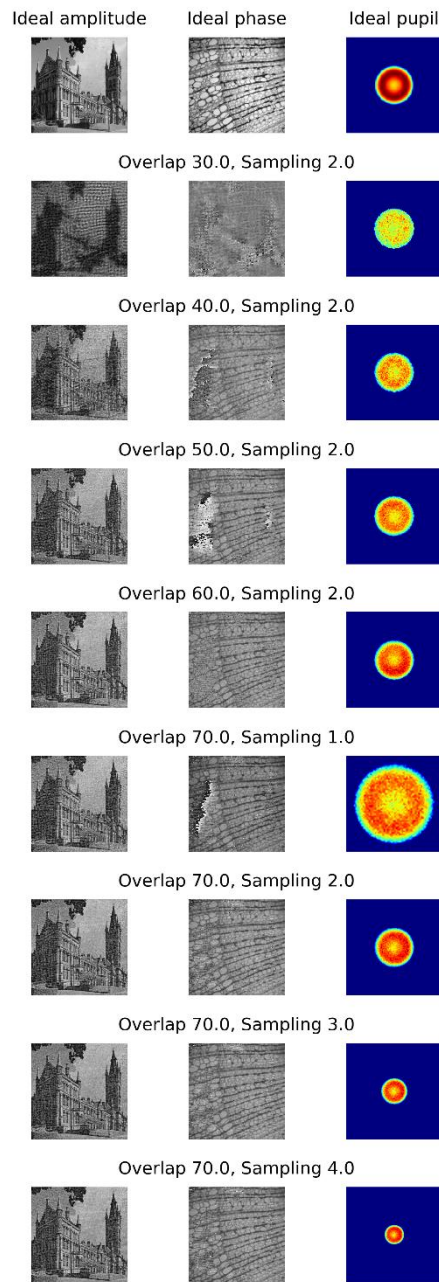

**Supplementary Figure S2 1** Reconstructions from images obtained with a monochrome sensor (no Bayer filter) using the standard FPM algorithm. First row shows the expected ideal reconstruction and the remaining rows shows the reconstructions from datasets captured with (1) various image sampling criteria and (2) overlap between the spatial frequencies captured by any two adjacent illumination angles. Noise and aberrations are added in the simulated images to mimic the experimental conditions.



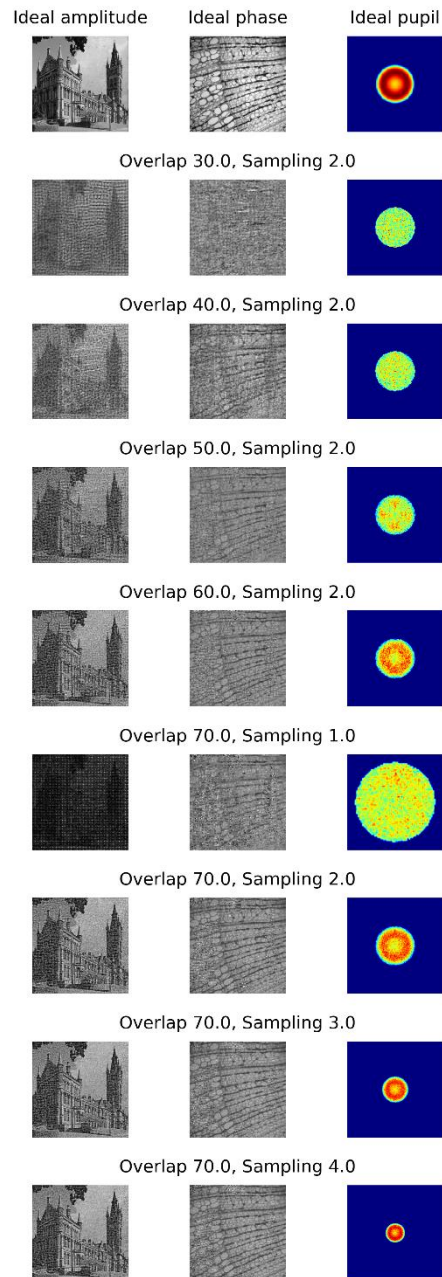

**Supplementary Figure S2 2** Reconstructions from images obtained with a color sensor (with Bayer filter array) using the sparsely-sampled FPM algorithm. These images are sparse due to the intermittent sampling from the Bayer filter array. First row shows the expected ideal reconstruction and the remaining rows shows the reconstructions from datasets captured with (1) various image sampling criteria and (2) overlap between the spatial frequencies captured by any two adjacent illumination angles. Noise and aberrations are added in the simulated images to mimic the experimental conditions.

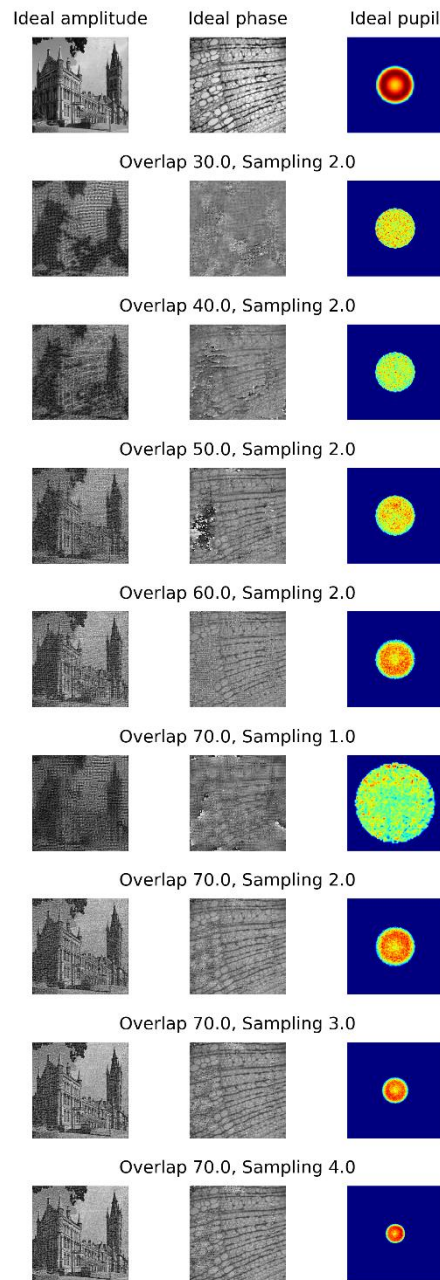

**Supplementary Figure S2 3** Reconstructions from images obtained with a color sensor (with Bayer filter array) using the standard FPM algorithm after demosaicing. The sparse images captured from the Bayer filter array are demosaiced (bilinear interpolation) such that the standard FPM algorithm can be implemented. First row shows the expected ideal reconstruction and the remaining rows shows the reconstructions from datasets captured with (1) various image sampling criteria and (2) overlap between the spatial frequencies captured by any two adjacent illumination angles. Noise and aberrations are added in the simulated images to mimic the experimental conditions.

601

602

603

604 **Acknowledgments:** We thank Victor Lovic for his help in 3D printing and building the setup,  
605 Nicholas Nugent for his help in writing the tutorial and we are grateful to Dr. Jonathan Taylor  
606 for his feedback on the manuscript. **Funding:** This research was funded by Engineering and  
607 Physical Sciences Research Council (EPSRC) under the grant EP/L016753/1. **Author**  
608 **contributions:** P.C.K conceived the idea, contributed to the design, development of the  
609 algorithms and theory. P.C.K and A.H oversaw the experiments. T.A designed and performed  
610 the experiments, developed the final reconstruction and calibration algorithms and contributed  
611 to the development of the theory. R.E and L.W provided code and support for misalignment  
612 calibration. All authors participated in the writing and the revisions of the manuscript.  
613 **Competing interests:** Authors declare no competing interests. **Data and materials**  
614 **availability:** Raw data and computer codes used for image processing can be obtained from  
615 <http://dx.doi.org/10.5525/gla.researchdata.687>. Data acquisition codes and 3D-printed designs  
616 can be obtained from <http://dx.doi.org/10.5525/gla.researchdata.594>.

## 617 References

- 618 1. C. A. Petti, C. R. Polage, T. C. Quinn, A. R. Ronald, and M. A. Sande, "Laboratory Medicine in Africa: A Barrier to Effective  
619 Health Care," *Clin. Infect. Dis.* **42**, 377–382 (2006).
- 620 2. M. Imwong, S. Hanchana, B. Malleret, L. Rénia, N. P. J. Day, A. Dondorp, F. Nosten, G. Snounou, and N. J. White, "High-  
621 throughput ultrasensitive molecular techniques for quantifying low-density malaria parasitemias," *J. Clin. Microbiol.* **52**, 3303–9  
622 (2014).
- 623 3. D. Mendlovic, A. W. Lohmann, and Z. Zalevsky, "Space-bandwidth product adaptation and its application to superresolution:  
624 examples," *J. Opt. Soc. Am. A* **14**, 563 (1997).
- 625 4. P. C. Konda, "Multi-Aperture Fourier Ptychographic Microscopy: Development of a high-speed gigapixel coherent computational  
626 microscope," (2017).
- 627 5. G. McConnell, J. Trägårdh, R. Amor, J. Dempster, E. Reid, and W. B. Amos, "A novel optical microscope for imaging large embryos  
628 and tissue volumes with sub-cellular resolution throughout," *Elife* **5**, 1–15 (2016).
- 629 6. G. Zheng, X. Ou, and C. Yang, "0.5 Gigapixel Microscopy Using a Flatbed Scanner," *Biomed. Opt. Express* **5**, 1–8 (2013).
- 630 7. D. N. Breslauer, R. N. Maamari, N. A. Switz, W. A. Lam, and D. A. Fletcher, "Mobile phone based clinical microscopy for global  
631 health applications," *PLoS One* **4**, 1–7 (2009).
- 632 8. N. A. Switz, M. V. D'Ambrosio, and D. A. Fletcher, "Low-cost mobile phone microscopy with a reversed mobile phone camera  
633 lens," *PLoS One* **9**, (2014).
- 634 9. Z. J. Smith, K. Chu, A. R. Espenson, M. Rahimzadeh, A. Gryshuk, M. Molinaro, D. M. Dwyre, S. Lane, D. Matthews, and S.  
635 Wachsmann-Hogiu, "Cell-phone-based platform for biomedical device development and education applications," *PLoS One* **6**,  
636 (2011).
- 637 10. Z. F. Phillips, M. V. D'Ambrosio, L. Tian, J. J. Rulison, H. S. Patel, N. Sadras, A. V. Gande, N. A. Switz, D. A. Fletcher, and L.  
638 Waller, "Multi-contrast imaging and digital refocusing on a mobile microscope with a domed LED array," *PLoS One* **10**, 1–13  
639 (2015).
- 640 11. J. P. Sharkey, D. C. W. Foo, A. Kabla, J. J. Baumberg, and R. W. Bowman, "A one-piece 3D printed flexure translation stage for  
641 open-source microscopy," *Rev. Sci. Instrum.* **87**, (2016).
- 642 12. A. Skandarajah, C. D. Reber, N. A. Switz, and D. A. Fletcher, "Quantitative imaging with a mobile phone microscope," *PLoS One*  
643 **9**, (2014).
- 644 13. J. S. Cybulski, J. Clements, and M. Prakash, "Foldscope: Origami-based paper microscope," *PLoS One* **9**, (2014).
- 645 14. G. Zheng, R. Horstmeyer, and C. Yang, "Wide-field, high-resolution Fourier ptychographic microscopy," *Nat. Photonics* **7**, 739–  
646 745 (2013).
- 647 15. J. W. Goodman, *Introduction to Fourier Optics* (2005), Vol. 8.
- 648 16. X. Ou, G. Zheng, and C. Yang, "Embedded pupil function recovery for Fourier ptychographic microscopy," *Opt. Express* **22**, 4960–  
649 72 (2014).
- 650 17. L.-H. Yeh, L. Tian, Z. Liu, M. Chen, J. Zhong, and L. Waller, "Experimental robustness of Fourier Ptychographic phase retrieval  
651 algorithms," *Imaging Appl. Opt.* 2015 **23**, CW4E.2 (2015).
- 652 18. L. Tian, Z. Liu, L.-H. Yeh, M. Chen, J. Zhong, and L. Waller, "Computational illumination for high-speed in vitro Fourier  
653 ptychographic microscopy," *Optica* **2**, 904–911 (2015).
- 654 19. Z. Bian, S. Dong, and G. Zheng, "Adaptive system correction for robust Fourier ptychographic imaging," *Opt. Express* **21**, 32400–  
655 10 (2013).
- 656 20. R. Eckert, Z. F. Phillips, and L. Waller, "Efficient illumination angle self-calibration in Fourier ptychography," *Appl. Opt.* **57**, 5434  
657 (2018).
- 658 21. S. Dong, K. Guo, P. Nanda, R. Shiradkar, and G. Zheng, "FPscope: a field-portable high-resolution microscope using a cellphone  
659 lens," *Biomed. Opt. Express* **5**, 3305–10 (2014).
- 660 22. M. Pagnutti, R. E. Ryan, G. Cazenavette, M. Gold, R. Harlan, E. Leggett, and J. Pagnutti, "Laying the foundation to use Raspberry  
661 Pi 3 V2 camera module imagery for scientific and engineering purposes," *J. Electron. Imaging* **26**, 013014 (2017).
- 662 23. S. Dong, Z. Bian, R. Shiradkar, and G. Zheng, "Sparsely sampled Fourier ptychography," *Opt. Express* **22**, 5455 (2014).
- 663 24. J. Sun, Q. Chen, Y. Zhang, and C. Zuo, "Sampling criteria for Fourier ptychographic microscopy in object space and frequency  
664 space," *Opt. Express* **24**, 15765 (2016).
- 665 25. L. Waller and L. Tian, "3D Phase Retrieval with Computational Illumination," in *Imaging and Applied Optics 2015*, OSA Technical  
666 Digest (Online) (Optical Society of America, 2015), p. CW4E.1.

- 667  
668  
669  
670  
671  
672  
673  
674  
675  
676  
677  
678  
679  
680  
681  
682  
683  
684  
685  
686  
687  
688  
689  
690  
691  
692  
693  
694  
695  
696  
697  
698
26. K. Guo, S. Dong, and G. Zheng, "Fourier Ptychography for Brightfield, Phase, Darkfield, Reflective, Multi-Slice, and Fluorescence Imaging," *IEEE J. Sel. Top. Quantam Electron.* **22**, 1–12 (2016).
  27. Z. Liu, L. Tian, S. Liu, and L. Waller, "Real-time brightfield, darkfield, and phase contrast imaging in a light-emitting diode array microscope," *J. Biomed. Opt.* **19**, 106002 (2014).
  28. S. Dong, R. Shiradkar, P. Nanda, and G. Zheng, "Spectral multiplexing and coherent-state decomposition in Fourier ptychographic imaging," *Biomed. Opt. Express* **5**, 22817–22825 (2014).
  29. L. Tian, X. Li, K. Ramchandran, and L. Waller, "Multiplexed coded illumination for Fourier Ptychography with an LED array microscope," *Biomed. Opt. Express* **162**, 4960–4972 (2014).
  30. T. Nguyen, Y. Xue, Y. Li, L. Tian, and G. Nehmetallah, "Convolutional neural network for Fourier ptychography video reconstruction: learning temporal dynamics from spatial ensembles," (2018).
  31. J. V. Tu, "Advantages and disadvantages of using artificial neural networks versus logistic regression for predicting medical outcomes," *J. Clin. Epidemiol.* **49**, 1225–1231 (1996).
  32. P. C. Konda, J. M. Taylor, and A. R. Harvey, "Scheimpflug multi-aperture Fourier ptychography: coherent computational microscope with gigapixels/s data acquisition rates using 3D printed components," in *High-Speed Biomedical Imaging and Spectroscopy: Toward Big Data Instrumentation and Management II* (2017), Vol. 10076, p. 100760R.
  33. P. C. Konda, J. M. Taylor, and A. R. Harvey, "Parallelized aperture synthesis using multi-aperture Fourier ptychographic microscopy," arXiv Prepr. arXiv ID 1806.02317 (2018).
  34. Z. F. Phillips, R. Eckert, and L. Waller, "Quasi-Dome : A Self-Calibrated High-NA LED Illuminator for Fourier Ptychography," in *Imaging and Applied Optics 2017* (2017).
  35. D. Jones, "Picamera 1.13 Documentation," <https://picamera.readthedocs.io/en/release-1.13/>.
  36. S. van der Walt, S. C. Colbert, and G. Varoquaux, "The NumPy Array: A Structure for Efficient Numerical Computation," *Comput. Sci. Eng.* **13**, 22–30 (2011).
  37. G. R. Bradski and A. Kachler, *Learning OpenCV: Computer Vision with the OpenCV Library* (O'Reilly, 2008).
  38. L.-H. Yeh, J. Dong, J. Zhong, L. Tian, M. Chen, G. Tang, M. Soltanolkotabi, and L. Waller, "Experimental robustness of Fourier Ptychography phase retrieval algorithms," *Opt. Express* **23**, 38–43 (2015).
  39. C. Zuo, J. Sun, and Q. Chen, "Adaptive step-size strategy for noise-robust Fourier ptychographic microscopy," *Opt. Express* **24**, 4960–4972 (2016).
  40. J. Schindelin, I. Arganda-Carreras, E. Frise, V. Kaynig, M. Longair, T. Pietzsch, S. Preibisch, C. Rueden, S. Saalfeld, B. Schmid, J.-Y. Tinevez, D. J. White, V. Hartenstein, K. Eliceiri, P. Tomancak, and A. Cardona, "Fiji: an open-source platform for biological-image analysis," *Nat. Methods* **9**, 676–682 (2012).
